# Supplementary material
Source: PubMed Central journal article supplement (PMC3634918)
Supplement: NIHMS403938-supplement-Supp_Table_S1-S2_Figure_S1.pdf [file NIHMS403938-supplement-Supp_Table_S1-S2_Figure_S1.pdf]

## **Supplementary Information**

### **3Drefine: Consistent Protein Structure Refinement by Optimizing Hydrogen-Bonding Network and Atomic-Level Energy Minimization**

**Debswapna Bhattacharya and Jianlin Cheng**

#### **Glossary of Supplementary Information**

**Table S1: This table provides results of 3Drefine and all groups participating in CASP8 Refinement Experiment and is cited in the second section of RESULTS AND DISCUSSIONS.**

**Table S2: This table provides results of 3Drefine and all groups participating in CASP9 Refinement Experiment and is cited in the third section of RESULTS AND DISCUSSIONS.**

**Figure S1: This figure provides a histogram of the score for 107 CASP9 targets and is cited in fifth section of RESULTS AND DISCUSSIONS.**

## Supplementary Tables

**Table S1, related to Table II.** Refinement results for 3Drefine and all the participating groups in CASP8 Refinement Experiment\*.

| Group Name        | No. of Targets <sup>a</sup> | GDT-HA <sup>b</sup> | TM-score <sup>c</sup> | MolProbity <sup>d</sup> |
|-------------------|-----------------------------|---------------------|-----------------------|-------------------------|
| 3Drefine          | 12                          | 6.932               | 9.3289                | 2.349                   |
| NULL <sup>e</sup> | 12                          | 6.898               | 9.316                 | 2.706                   |
| LEE               | 12                          | 6.86                | 9.195                 | 2.613                   |
| LevittGroup       | 12                          | 6.701               | 9.16                  | 2.875                   |
| FAMSD             | 12                          | 6.562               | 8.746                 | 2.796                   |
| SAM-T08-human     | 12                          | 6.523               | 9.084                 | 2.762                   |
| YASARARefine      | 12                          | 6.407               | 9.155                 | 1.071                   |
| Bates_BMM         | 12                          | 6.167               | 8.734                 | 2.737                   |
| FEIG_REFINE       | 11                          | 6.158               | 8.462                 | 2.192                   |
| FAMS-multi        | 12                          | 6.055               | 8.281                 | 3.42                    |
| Abagyan           | 10                          | 6.054               | 8.262                 | 3.136                   |
| xianmingpan       | 11                          | 5.977               | 8.474                 | 1.698                   |
| A-TASSER          | 11                          | 5.751               | 8.133                 | 2.597                   |
| POISE             | 12                          | 5.556               | 8.376                 | 1.844                   |
| SAMUDRALA         | 10                          | 5.441               | 7.19                  | 2.329                   |
| DBAKER            | 9                           | 5.413               | 7.041                 | 1.636                   |
| MidwayFolding     | 10                          | 5.273               | 7.251                 | 3.528                   |
| Jones-UCL         | 12                          | 5.175               | 8.089                 | 3.402                   |
| tripos_08         | 8                           | 4.619               | 6.295                 | 2.826                   |
| Elofsson          | 12                          | 4.596               | 6.763                 | 2.713                   |
| jacobson          | 7                           | 4.288               | 5.566                 | 2.855                   |
| Keasar            | 7                           | 3.552               | 5.413                 | 2.765                   |
| POEM              | 8                           | 2.652               | 4.356                 | 4.304                   |
| PS2-server        | 3                           | 1.646               | 2.206                 | 3.035                   |
| EB_AMU_Physics    | 3                           | 1.61                | 2.421                 | 2.867                   |
| TASSER            | 2                           | 1.131               | 1.652                 | 2.913                   |
| Kolinski          | 1                           | 0.565               | 0.845                 | 2.602                   |

<sup>a</sup> Number of CASP8 targets in the Refinement Experiment.

<sup>b</sup> Cumulative GDT-HA score based on the first submitted model.

<sup>c</sup> Cumulative TM-score based on the first submitted model.

<sup>d</sup> Average MolProbity score based on the first submitted model.

<sup>e</sup> The initial models for the CASP8 refinement experiment.

\* Refinement results for groups other than 3Drefine have been adopted from [1], [2].

**Table S2, related to Table 11.** Refinement results for 3Drefine and all the participating groups in CASP9 Refinement Experiment\*.

| <b>Group Name</b> | <b>No. of Targets<sup>a</sup></b> | <b>GDT-HA<sup>b</sup></b> | <b>TM-score<sup>c</sup></b> | <b>MolProbit<sup>d</sup></b> |
|-------------------|-----------------------------------|---------------------------|-----------------------------|------------------------------|
| 3Drefine          | 14                                | 7.388                     | 10.388                      | 2.101                        |
| ZHANG             | 14                                | 7.365                     | 10.396                      | 3.042                        |
| SEOK              | 14                                | 7.359                     | 10.399                      | 3.436                        |
| NULL <sup>e</sup> | 14                                | 7.319                     | 10.368                      | 2.521                        |
| FAMSD             | 14                                | 7.284                     | 10.348                      | 2.55                         |
| FAMS-MULTI        | 14                                | 7.284                     | 10.348                      | 2.55                         |
| KNOWMIN           | 14                                | 7.194                     | 10.182                      | 2.179                        |
| TASSER            | 14                                | 7.164                     | 10.259                      | 3.16                         |
| BAKER             | 14                                | 7.156                     | 10.287                      | 1.327                        |
| SAMUDRALA         | 14                                | 7.031                     | 10.038                      | 2.395                        |
| YASARA            | 14                                | 7.023                     | 10.043                      | 0.969                        |
| GWS               | 14                                | 6.962                     | 9.74                        | 2.585                        |
| LEE               | 14                                | 6.962                     | 9.74                        | 2.751                        |
| PCOMB             | 14                                | 6.876                     | 9.866                       | 1.407                        |
| GENESILICO        | 14                                | 6.849                     | 9.994                       | 3.633                        |
| SHORTLE           | 14                                | 6.834                     | 10.04                       | 3.513                        |
| RECOMBINEIT       | 14                                | 6.779                     | 9.854                       | 3.177                        |
| PCONS             | 14                                | 6.631                     | 9.678                       | 1.495                        |
| FEIG              | 13                                | 6.612                     | 9.26                        | 2.238                        |
| PROQ2             | 14                                | 6.496                     | 9.61                        | 1.623                        |
| PCONSM            | 14                                | 6.491                     | 9.57                        | 1.343                        |
| PROQ              | 14                                | 6.246                     | 9.454                       | 1.542                        |

<sup>a</sup> Number of CASP9 targets in the Refinement Experiment.

<sup>b</sup> Cumulative GDT-HA score based on the first submitted model.

<sup>c</sup> Cumulative TM-score based on the first submitted model.

<sup>d</sup> Average MolProbit score based on the first submitted model.

<sup>e</sup> The initial models for the CASP9 refinement experiment.

\* Refinement results for groups other than 3Drefine have been adopted from [1], [3].

## Supplementary Figures

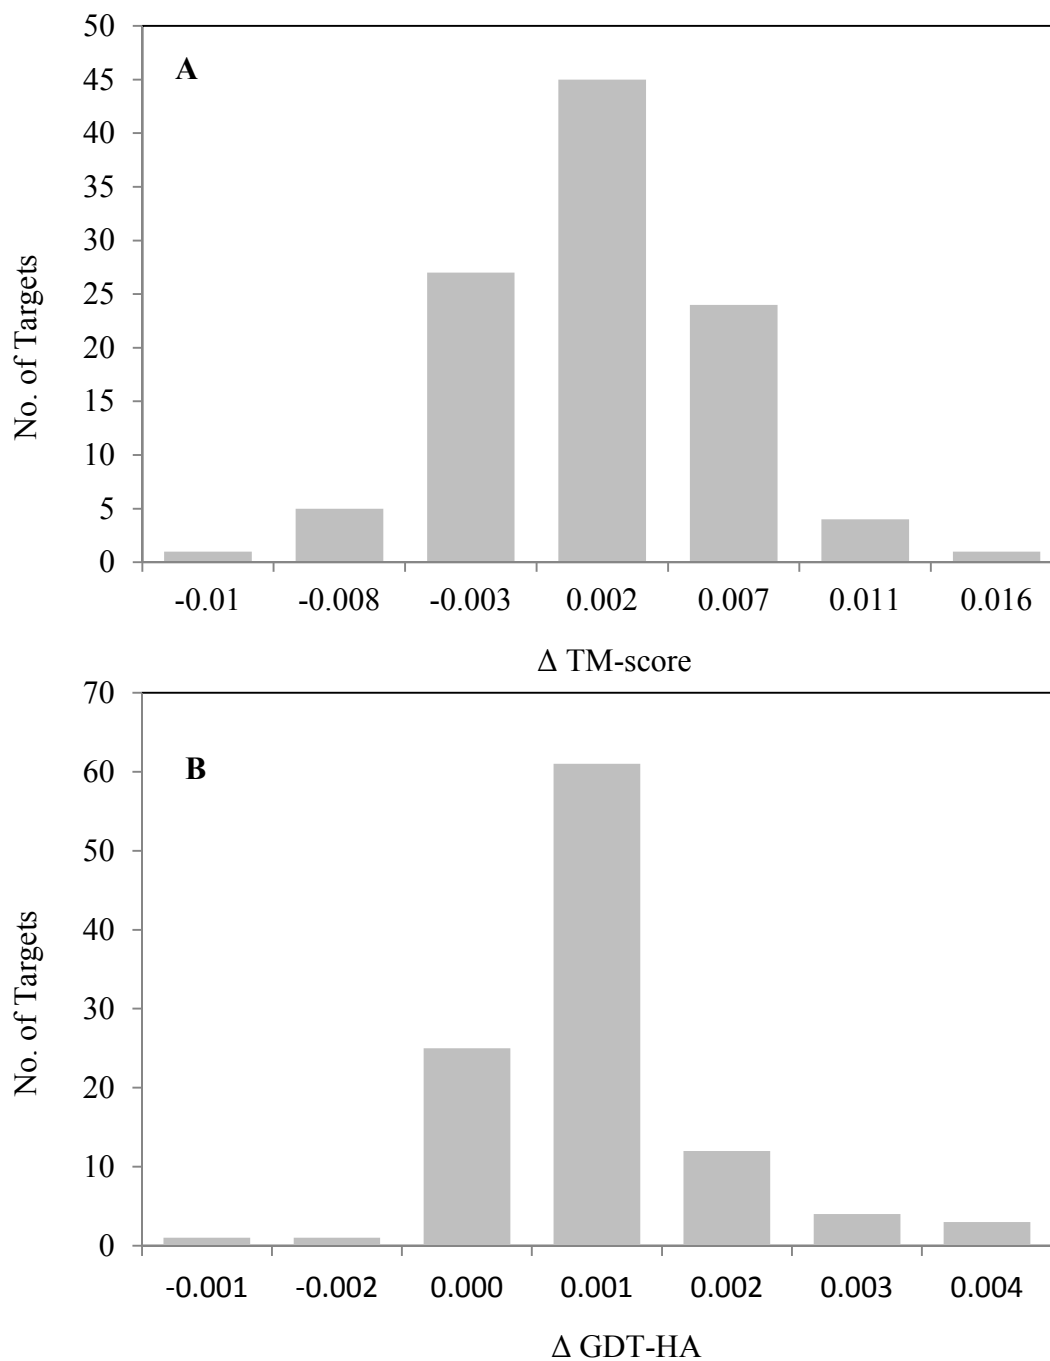

**Figure S1, related to Figure 5.** The histogram of score changes for 107 CASP9 targets (Initial structures generated using MULTICOM-REFINE).

(A) Histogram for TM-score changes.

(B) Histogram for GDT-HA score changes.

A positive change indicates that the quality of the model of a target was improved by refinement.

## References:

1. Zhang J, Liang Y, Zhang Y (2011). Atomic-Level Protein Structure Refinement Using Fragment-Guided Molecular Dynamics Conformation Sampling. *Structure*, vol 19, 1784-1795.
2. MacCallum JL., Hua L, Schnieders MJ, Pande VS, Jacobson MP, Dill KA (2009). Assessment of the protein-structure refinement category in CASP8. *Proteins* 77 (Suppl 9), 66–80.
3. MacCallum JL, Pe´rez A, Schnieders MJ, Hua L, Matthew, Jacobson P, Dill KA. (2011). Assessment of protein structure refinement in CASP9. *Proteins* 79 (Suppl 10), 74-90.
